# Supplementary material
Source: PubMed Central journal article supplement (PMC5048102)
Supplement: NIHMS818882-supplement-supplemental_data.pdf [file NIHMS818882-supplement-supplemental_data.pdf]

## SUPPLEMENTAL DATA

### I. SUPPLEMENTAL METHODS

#### ***1a. Data collection and end-point definition***

Postoperative ventricular arrhythmias were defined as new onset sustained ventricular tachycardia (lasting  $\geq 30$  s or requiring cardioversion) or ventricular fibrillation. The Duke Clinical Research Institute Follow-up Services Group conducted long-term follow-up, by collecting annual information on death and non-fatal events for the Duke Databank for Cardiovascular Disease.<sup>1</sup> Patients are surveyed by means of a mailed, self-administered questionnaire, with non-responders surveyed by telephone. Information on death is collected through next-of-kin interviews, reviews of hospital discharge summaries and death certificates, supplemented by annual queries of the National Death Index for patients lost to follow-up (2%) or withdrawn (3%).

QT interval duration was recorded in leads II and V<sub>4</sub> for 3 consecutive beats from the start of the QRS complex to the end of the T wave, which was the visual return of the T wave to the isoelectric line. Where a U wave followed the T wave, the end of the T wave was defined as the nadir between the T and U waves. When it was not possible to clearly identify the T wave, the lead was excluded from further analysis.<sup>2</sup>

#### ***1b. Candidate gene and polymorphism selection***

Using the SeattleSNPs Variation Discovery Resource (<http://pga.gs.washington.edu/>), we selected 45 single nucleotide polymorphisms (SNP) within these candidate genes, with an emphasis on common (minor allele frequency  $>5\%$ ) variants functionally relevant to the physiological disturbances underlying arrhythmia susceptibility, based on preliminary functional characterization of variant proteins in vitro, in genetically modified animals, or computer simulations, as well as previous genetic epidemiological analyses. A list of the candidate genes and polymorphisms studied is provided in **Table S1**. Additionally, an external reference panel of 54 ancestry-informative unlinked markers was used to assess and control for population structure, as previously described (see **1e** and **Table S3**).<sup>3</sup>

**Supplemental Table 1.** Candidate genes and polymorphisms evaluated in the study\*

| Pathway                  | Chr       | SNP       | BP                                                   | Gene                                                                   |
|--------------------------|-----------|-----------|------------------------------------------------------|------------------------------------------------------------------------|
| Ion channels             | 3         | rs1805124 | 38645420                                             | <i>SCN5A</i> (Na channel, Long QT)                                     |
|                          | 11        | rs1057128 | 2797237                                              | <i>KCNQ1</i> (K channel, voltage-gated IKs)                            |
| Adrenergic tone          | 10        | rs1801253 | 115805056                                            | <i>ADRB1</i> (beta-1 adrenergic receptor)                              |
|                          | 10        | rs1801252 | 115804036                                            |                                                                        |
|                          | 5         | rs1042711 | 148206348                                            | <i>ADRB2</i> (beta-2 adrenergic receptor)                              |
|                          | 5         | rs1042713 | 148206440                                            |                                                                        |
|                          | 5         | rs1042714 | 148206473                                            |                                                                        |
|                          | 5         | rs1800888 | 148206885                                            |                                                                        |
|                          | 8         | rs4994    | 37823798                                             | <i>ADRB3</i> (beta-3 adrenergic receptor)                              |
|                          | 12        | rs5443    | 6954875                                              | <i>GNB3</i> (G-protein beta-3 subunit)                                 |
| 10                       | rs2072362 | 119014023 | <i>VMAT2</i> (SLC18A2-vesicular amine transporter 2) |                                                                        |
| 22                       | rs165688  | 19951271  | <i>COMT</i> (catecholamine-O-methyl transferase)     |                                                                        |
| Tissue/matrix remodeling | 1         | rs4762    | 230845977                                            | <i>AGT</i> (Angiotensinogen)                                           |
|                          | 1         | rs699     | 230845794                                            |                                                                        |
|                          | 1         | rs5051    | 230849872                                            |                                                                        |
|                          | 17        | rs4646994 | 61565904                                             | <i>ACE</i> (Angiotensin Converting Enzyme)                             |
|                          | 17        | rs4344    | 61566724                                             |                                                                        |
|                          | 17        | rs4291    | 61554194                                             |                                                                        |
| 3                        | rs5186    | 148459988 | <i>AGTR1</i> (Ag receptor 1)                         |                                                                        |
| 11                       | rs3025058 | 102715948 | <i>MMP3</i> (Matrix metalloproteinase 3)             |                                                                        |
| 20                       | rs3918242 | 44635976  | <i>MMP9</i> (Matrix metalloproteinase 9)             |                                                                        |
| Inflammation             | 6         | rs1800629 | 31543031                                             | <i>TNFA</i> (Tumor Necrosis Factor alpha)                              |
|                          | 6         | rs361525  | 31543101                                             |                                                                        |
|                          | 6         | rs1800610 | 31543827                                             |                                                                        |
|                          | 1         | rs1061622 | 12252955                                             | <i>TNFRSF1B</i> (Tumor necrosis factor receptor superfamily member 1B) |
|                          | 2         | rs17561   | 113537223                                            | <i>IL1A</i> (Interleukin-1 alpha)                                      |
|                          | 2         | rs1800587 | 113542960                                            |                                                                        |
|                          | 2         | rs1143633 | 113590467                                            | <i>IL1B</i> (Interleukin-1 beta)                                       |
|                          | 2         | rs16944   | 113594867                                            |                                                                        |
|                          | 2         | rs315952  | 113890304                                            | <i>IL1RN</i> (Interleukin receptor-1 receptor antagonist)              |
|                          | 2         | rs419598  | 113887207                                            |                                                                        |
|                          | 7         | rs1800795 | 22766645                                             | <i>IL6</i> (Interleukin-6)                                             |
| 7                        | rs1800796 | 22766246  |                                                      |                                                                        |
| 1                        | rs1800871 | 206946634 | <i>IL10</i> (Interleukin-10)                         |                                                                        |
| 1                        | rs1205    | 159682233 | <i>CRP</i> (C-reactive protein)                      |                                                                        |
| 19                       | rs1800468 | 41860587  | <i>TGFB1</i> (Transforming growth factor beta-1)     |                                                                        |
| 19                       | rs1800469 | 41860296  |                                                      |                                                                        |
| 19                       | rs1800471 | 41858876  |                                                      |                                                                        |
| 19                       | rs1800470 | 41858921  |                                                      |                                                                        |
| 19                       | rs1800472 | 41847860  |                                                      |                                                                        |
| Oxidative stress         | 7         | rs2070744 | 150690079                                            | <i>NOS3</i> (endothelial nitric oxide synthase)                        |
|                          | 7         | rs1799983 | 150696111                                            |                                                                        |
|                          | 7         | rs1799985 | 150709570                                            |                                                                        |
|                          | 11        | rs769214  | 34459717                                             | <i>CAT</i> (catalase)                                                  |
|                          | 11        | rs1001179 | 34460231                                             |                                                                        |

Chr, chromosome; SNP, single nucleotide polymorphism; BP, base pair position

\*Based on Entrez SNP (<http://www.ncbi.nlm.nih.gov/sites/entrez?db=pubmed>)

### Ic. Genotyping and quality controls

Blood was collected immediately before surgery. Genomic DNA extraction was performed using the Puregene system (Gentra Systems, Minneapolis, MN), quantified via PicoGreen fluorescence enhancement (Molecular Probes, Eugene, OR), and stored at -80°C. Genotyping was performed by matrix-assisted laser desorption/ionization time-of-flight mass spectrometry on a Sequenom™ MassARRAY system (Sequenom, San Diego, CA) at a core facility (Agencourt Bioscience Corporation Beverly, MA).<sup>4</sup> Primers used and polymorphisms details can be found in **Table S2**. SpectroTyper 3.1 software (Sequenom, San Diego, CA) was used for raw data analysis, with spectra and cluster plots checked by visual inspection of intensity plots and manual curation of genotype calls. A SNP call rate threshold of >85% was imposed on all variants genotyped. Genotyping accuracy of the Sequenom MassARRAY system was estimated at 99.6%.<sup>5</sup> Reproducibility of genotyping was validated in our cohort at >99% by scoring a panel of 6 SNPs in 100 randomly selected patients using ABI 3700 capillary sequencer (Applied Biosystems, Foster City, CA). Hardy-Weinberg equilibrium (HWE) was evaluated in controls using an exact test.<sup>6</sup> Eight SNPs were found to deviate from HWE ( $P < 0.001$ , based on Bonferroni corrected threshold of 45 markers) and were excluded from subsequent analyses.

**Table S2.** MALDI-TOF Genotyping Assay Primers

| SNP id*    | P2                               | P1                             | UEP                     |
|------------|----------------------------------|--------------------------------|-------------------------|
| rs4344     | ACGTTGGATGACAATGTTGTGATGGGTGCC   | ACGTTGGATGATCTATGTCGGGCAAGTCAC | CAAGATTATTAACCTCTCTCCC  |
| rs4291     | ACGTTGGATGCGAGGAAAGCTGGAGAAAG    | ACGTTGGATGTCGGGTGTCCGGCAACTG   | CTGGAGAAAGGGCCCTCTCTTT  |
| rs1801253  | ACGTTGGATGATCACTACTGCGCAGCC      | ACGTTGGATGTCCTCGTGGTTCGCGTGGC  | CGACTCCGCAAGGCCTTCCAG   |
| rs1801252  | ACGTTGGATGCTCGTTGCTGCCCTCCGCC    | ACGTTGGATGATGAGCGCCATCAGCAGACC | CTGCCTCCCGCCAGCGAA      |
| rs1042711  | ACGTTGGATGAATGAGGCTCCAGGCGTCC    | ACGTTGGATGTCGGCAGGTAAGCGCACTG  | CCCGCCGTGGTCCGCC        |
| rs1042713  | ACGTTGGATGAACGGCAGCGCTTCTTGCT    | ACGTTGGATGCACACCTCGTCCCTTTGCTG | CGCCTTCTTGTGGCACCACAT   |
| rs1042714  | ACGTTGGATGAGACATGACGATGCCCATGC   | ACGTTGGATGTTGCTGGCACCACATGGAAG | ACCCACACCTCGTCCCTTT     |
| rs1800888  | ACGTTGGATGAGTGCATCTGAATGGCAAG    | ACGTTGGATGTGCTGACCAAGAATAAGGCC | CATCTGAATGGGCAAGAAGAG   |
| rs4994     | ACGTTGGATGAGGCAACCTGCTGGTGCATC   | ACGTTGGATGGCGAAGTACGAAACAGGTTG | CTGGTCATCGTGGCCATCGCC   |
| rs699      | ACGTTGGATGTGTGACAGGATGGAAGACTG   | ACGTTGGATGGTGGACGTAGGTGTTGAAAG | AAGACTGGCTGCTCCCTGA     |
| rs5051     | ACGTTGGATGTACCTTCTGCTAGTACCC     | ACGTTGGATGCCCTCAGCTATAAATAGGG  | AACAACGGCAGCTTCTCTCCC   |
| rs4762     | ACGTTGGATGACAAACGGCTGCTCAGGTG    | ACGTTGGATGTGTACAGGGCTGCTAGTGG  | CTGTGAACAGCCACCACC      |
| rs5186     | ACGTTGGATGATTCCTCTGCAGCACTTCA    | ACGTTGGATGCGGTTACGTCACATAATGC  | GCACCTTCACTCAAATGAGC    |
| rs17880664 | ACGTTGGATGACCTCAGCAGGCAAATCTG    | ACGTTGGATGCTGATTGGCTGAGCCTGAAG | ATCTGCCTGTGCCCGAG       |
| rs1001179  | ACGTTGGATGAGGATGCTGATAACCGGGAG   | ACGTTGGATGTCTGGCCAGCAATTGGAGAG | CGCCCTGGGTTCCGGTAT      |
| rs165688   | ACGTTGGATGACCAGCGGATGGTGGATTC    | ACGTTGGATGGCCCTTTTCCAGGCTGAC   | GATGGTGGATTCGCTGGC      |
| rs1205     | ACGTTGGATGGCCATCTTGTGGCCACATG    | ACGTTGGATGGTTGTCAATCCCTTGGCTC  | TTGTTGGCCACATGGAGAGACT  |
| rs5443     | ACGTTGGATGTCTCCACGAGAGCATCATC    | ACGTTGGATGTCGAGCCAGCAATAGTAG   | ATCATCTGCCGCATCACGTC    |
| rs1800587  | ACGTTGGATGTTGGGAGAAAGGAAAGCATG   | ACGTTGGATGTTTACCACCTGAACTAGGC  | TTTTTACATATGAGCCTTCAATG |
| rs17561    | ACGTTGGATGTTTACATTGCTCAGGAAGC    | ACGTTGGATGATCTGCACCTGTGATCATGG | GCTCAGGAAGCTAAAAGGTG    |
| rs16944    | ACGTTGGATGATTTTCTCTCAGAGCTCC     | ACGTTGGATGTGTCTGTATTGAGGTGTGG  | TGCAATTGACAGAGAGCTCC    |
| rs1143633  | ACGTTGGATGTGACCCTATATGCTCAGGTG   | ACGTTGGATGTAATAAGCAAGGGCAGGCC  | CCTCCAAGAAATCAAATTTTGGC |
| rs315952   | ACGTTGGATGGAACAGAAAGCAGGACAAGC   | ACGTTGGATGAGGCGGCAGACTCAAACCTG | CGCCTTCACTCCGCTCAGACAG  |
| rs419598   | ACGTTGGATGTTGGATGTTAACAGAAAGAC   | ACGTTGGATGAATTGACATTTGGTCTTGC  | CTGAGGAACAACCACTAGTTGC  |
| rs1800795  | ACGTTGGATGAGCCTCAATGACGACCTAAG   | ACGTTGGATGGAATTGTGCAATGTGACGTC | TTTCCCTAGTTGTGCTTTC     |
| rs1800796  | ACGTTGGATGAGCCCTTGAAGTAACTGCAC   | ACGTTGGATGCTTCTGTGTTCTGGCTCTC  | CAGGCAGTCTACAACAGCC     |
| rs1800871  | ACGTTGGATGAGTGTGAGCAAACTGAGGCAC  | ACGTTGGATGATTCAGTTGGCAGCTGGT   | GCAAACTGAGGCACAGAGAT    |
| rs1057128  | ACGTTGGATGAGAAATTCACAGAGCGCG     | ACGTTGGATGATGCGCACCATGAGGTTGAG | GACGTCATTGAGCAGTACTC    |
| rs3025058  | ACGTTGGATGGTCTCATATCAATGTGGCC    | ACGTTGGATGCTATGGTCTCCATTCCTTTG | GGACAAGACATGGTTTTT      |
| rs3918242  | ACGTTGGATGAAAAATTAGCCAGGCGTGG    | ACGTTGGATGGGTTCAAGCAATCTCCTGC  | CCAGGCGTGGTGGCGCA       |
| rs1799983  | ACGTTGGATGAAACGGTCCGCTTGCAGCTGC  | ACGTTGGATGATCCCTTGGTGTCCAGTG   | GCTGCAGGCCCCAGATGA      |
| rs1799985  | ACGTTGGATGAGCGGCTGCATGACATTGAG   | ACGTTGGATGGTCCCTAGATTGTGTGACTC | TGAGAGCAAAGGTGAGGCTG    |
| rs2070744  | ACGTTGGATGAGTTTCCCTAGTCCCCCATG   | ACGTTGGATGAGTCAAGCAGAGACTAGGG  | CATCAAGCTCTTCCCTGGC     |
| rs1805124  | ACGTTGGATGGGGCCAGGGCACCAGCAGT    | ACGTTGGATGACAGCCGCGGGAGAGCGAGA | GGCCACCAGCAGTGTGTG      |
| rs1800468  | ACGTTGGATGTTGACCACTGTGCCATCCTC   | ACGTTGGATGTGGAGTGTGAGGGACTCTG  | GTCCGGGTTGTGGATGGTGGTGA |
| rs1800469  | ACGTTGGATGCTTACAGGTGTCTGCCCTCC   | ACGTTGGATGAGGGTGTGAGTGGGAGGAG  | GCCTCTGACCTTCCATCC      |
| rs1800471  | ACGTTGGATGTGCTGTGGCTACTGGTGTGCTG | ACGTTGGATGCACAGCTCCATGTGATAG   | GGTGTGACGCTGGCC         |
| rs1800472  | ACGTTGGATGACCAATCATGGCATGAACCG   | ACGTTGGATGAGCAATAGTTGGTGTCCAGG | CCTTCTGCTTCTCATGGCCA    |
| rs1800629  | ACGTTGGATGGATTTGTGTAGGACCCCTG    | ACGTTGGATGGTCCCCAAAAGAAATGGAG  | ACCTTGGAGGCTGAACCCCGTCC |
| rs1800610  | ACGTTGGATGAAAGATGTGCGCTGATAGG    | ACGTTGGATGCTGCCACATCTCTTCTG    | GGGAGGGATGGAGAGAAAAAAC  |
| rs361525   | ACGTTGGATGACACAATCAGTCACTGGCC    | ACGTTGGATGATCAAGGATACCCCTCACAC | GAAGACCCCTCGGAATC       |
| rs2072362  | ACGTTGGATGACGTCATGGGAATCGCCTTG   | ACGTTGGATGAGGCCCTCTTGGCAGTTTG  | CTTAGGTGGTAAGGCCCC      |

## Id. Controlling for population stratification

We employed a modified EIGENSTRAT method to control for population stratification,<sup>3, 7</sup> using an external reference panel of 54 ancestry-informative unlinked markers (**Table S3**). This method derives the principal components (PCs) of correlations among gene variants and corrects for those correlations in the association tests. Using principal component analysis implemented in Eigensoft v5.0.1 ([www.hsph.harvard.edu/alkes-price/software/](http://www.hsph.harvard.edu/alkes-price/software/)),<sup>3, 7</sup> we modeled ancestry differences on both the categorical and continuous postoperative QTc traits. All 15 principal components (PCs) were independently computed for the binary and continuous postoperative QTc phenotypes. We then performed multivariate regression analyses with a strategy of keeping all PCs up to the last PC with  $p < 0.05$  in each step to determine the number of PCs to be used for correction in the final analysis. For instance, starting with 15 PCs in the model, if PC(i) is the last PC with  $p < 0.05$ , we included PC(1) to PC(i) in the next multivariate model, and then repeat the process until the last PC remained nominally significant. Using this iterative multivariate analysis we selected the top 6 PCs for inclusion as covariates to adjust for ancestry, along with clinical variables, in multivariate logistic regression analysis of prolonged postoperative QTc (binary trait); similarly, the top 4 PCs were selected for models of the continuous postoperative QTc trait (**Table S4**).

**Table S3.** Unlinked SNP panel

| dbSNP ID# | Position in Human Genome (HG6) | Cytogenetic Position | Mean MAF in Pooled Caucasians, Japanese, and African American Samples | MAF in PEGASUS samples |
|-----------|--------------------------------|----------------------|-----------------------------------------------------------------------|------------------------|
| rs551585  | 86456981                       | 1p31.2               | 0.093                                                                 | 0.062                  |
| rs1024059 | 61223356                       | 1p32                 | 0.094                                                                 | 0.138                  |
| rs1366733 | 5406765                        | 2p25                 | 0.320                                                                 | 0.268                  |
| rs1400239 | 86279645                       | 3p12.3               | 0.110                                                                 | 0.014                  |
| rs916288  | 55949982                       | 3p21.31              | 0.224                                                                 | 0.291                  |
| rs975302  | 27842485                       | 3p24.3               | 0.336                                                                 | 0.476                  |
| rs1372727 | 150715756                      | 3q23                 | 0.077                                                                 | 0.065                  |
| rs1371569 | 180717779                      | 3q26.1               | 0.025                                                                 | 0.026                  |
| rs707341  |                                | 4p16.3               | 0.017                                                                 | 0.031                  |
| rs894533  | 87763683                       | 4q23                 | 0.075                                                                 | 0.090                  |
| rs1430935 | 121723954                      | 4q26                 | 0.264                                                                 | 0.277                  |
| rs1506806 | 186333138                      | 4q34.3               | 0.314                                                                 | 0.224                  |
| rs974722  | 1806579                        | 5p15.33              | 0.354                                                                 | 0.212                  |
| rs464513  | 83190873                       | 5q13.3               | 0.392                                                                 | 0.389                  |
| rs1546911 | 43781989                       | 6p12.3               | 0.043                                                                 | 0.017                  |
| rs1362189 | 8494                           | 6p25.3               | 0.025                                                                 | 0.014                  |
| rs534355  | 103316931                      | 6q16.1               | 0.374                                                                 | 0.371                  |
| rs1478811 | 128864928                      | 6q22.31              | 0.391                                                                 | 0.433                  |
| rs1033917 |                                | 6q25.1               | 0.250                                                                 | 0.409                  |
| rs940870  | 5582573                        | 7p22.1               | 0.323                                                                 | 0.224                  |
| rs1548622 | 100060865                      | 7q22.1               | 0.103                                                                 | 0.050                  |
| rs1547958 | 157291812                      | 7q36.1               | 0.129                                                                 | 0.196                  |
| rs1466060 | 43242322                       | 8p11.21              | 0.175                                                                 | 0.129                  |
| rs1391629 | 92111225                       | 8p21.3               | 0.171                                                                 | 0.119                  |
| rs1365034 | 77900792                       | 8q21.13              | 0.013                                                                 | 0.030                  |
| rs1600339 |                                | 8q23.1               | 0.317                                                                 | 0.294                  |
| rs1506508 | 142291940                      | 8q24.3               | 0.345                                                                 | 0.363                  |
| rs1417269 | 82500835                       | 9q21.32              | 0.280                                                                 | 0.321                  |
| rs1359711 | 112635178                      | 9q32                 | 0.150                                                                 | 0.097                  |
| rs827931  | 48760330                       | 10p11.21             | 0.090                                                                 | 0.137                  |
| rs1259606 | 80683283                       | 10q22.2              | 0.300                                                                 | 0.366                  |
| rs898256  | 113481767                      | 10q25                | 0.328                                                                 | 0.371                  |
| rs1374372 | 36896809                       | 11p13                | 0.240                                                                 | 0.290                  |
| rs1381911 | 5375134                        | 11p15.4              | 0.080                                                                 | 0.462                  |
| rs1451613 | 94519857                       | 11q14.3              | 0.089                                                                 | 0.115                  |
| rs982511  | 9962029                        | 12p13.31             | 0.034                                                                 | 0.117                  |
| rs1358351 | 129626795                      | 12q24.23             | 0.287                                                                 | 0.406                  |
| rs743760  | 31087241                       | 13q13.1              | 0.209                                                                 | 0.297                  |
| rs1350848 | 20950896                       | 14q11.2              | 0.146                                                                 | 0.153                  |
| rs1255351 | 49810455                       | 14q22.1              | 0.405                                                                 | 0.492                  |
| rs1467372 | 75312520                       | 14q24.3              | 0.244                                                                 | 0.114                  |
| rs1375168 | 23934318                       | 15q11.2              | 0.083                                                                 | 0.171                  |
| rs876549  | 48157119                       | 15q21.2              | 0.150                                                                 | 0.038                  |
| rs756803  | 28168864                       | 16p12                | 0.131                                                                 | 0.106                  |
| rs1382938 | 79196193                       | 16p13.3              | 0.117                                                                 | 0.097                  |
| rs889402  |                                | 16q22.2              | 0.181                                                                 | 0.175                  |
| rs739360  | 11239931                       | 17p12                | 0.060                                                                 | 0.010                  |
| rs1476813 | 71704561                       | 17q24.2              | 0.188                                                                 | 0.143                  |
| rs1405726 |                                | 18q12.3              | 0.073                                                                 | 0.026                  |
| rs1484729 | 72974243                       | 18q22.2              | 0.310                                                                 | 0.401                  |
| rs929215  | 21792407                       | 19p13.12             | 0.174                                                                 | 0.277                  |
| rs760998  | 38520696                       | 20q11.23             | 0.264                                                                 | 0.289                  |
| rs1474537 | 27043297                       | 21q21.3              | 0.225                                                                 | 0.355                  |
| rs1018799 | 30061708                       | 22q12.3              | 0.113                                                                 | 0.063                  |

MAF, minor allele frequency

**Table S4.** Principal Component Analysis of Population Stratification

|      | Prolonged postop QTc<br>(categorical) |                 | Rank transformed postop QTc<br>(continuous) |                 |
|------|---------------------------------------|-----------------|---------------------------------------------|-----------------|
|      | OR                                    | P_value         | Beta                                        | P_value         |
| PC1  | 2.782144                              | 0.188495        | 3.310165                                    | 0.055593        |
| PC2  | 2.619778                              | 0.239167        | 0.43679                                     | 0.810379        |
| PC3  | 0.571449                              | 0.493139        | -0.49459                                    | 0.785682        |
| PC4  | 3.708797                              | 0.112516        | 5.078131                                    | <b>0.005579</b> |
| PC5  | 0.803228                              | 0.786529        | 0.719328                                    | 0.68942         |
| PC6  | 7.522505                              | <b>0.013284</b> | 3.311688                                    | 0.06764         |
| PC7  | 1.732723                              | 0.493214        | 0.555689                                    | 0.755627        |
| PC8  | 0.991199                              | 0.991299        | 0.997271                                    | 0.579531        |
| PC9  | 0.305062                              | 0.149448        | 0.513325                                    | 0.779599        |
| PC10 | 0.931034                              | 0.930361        | -0.52439                                    | 0.773114        |
| PC11 | 0.816319                              | 0.806348        | -2.39437                                    | 0.193202        |
| PC12 | 5.161198                              | 0.045033        | 2.322211                                    | 0.202128        |
| PC13 | 3.379618                              | 0.129392        | 1.059284                                    | 0.554466        |
| PC14 | 0.491801                              | 0.401016        | -1.01822                                    | 0.588307        |
| PC15 | 1.799248                              | 0.478951        | -0.46184                                    | 0.802142        |

***le. Statistical analysis***

To assess whether genetic information independently adds prognostic value for postoperative QTc interval prolongation, univariately significant SNPs were entered into a clinico-genetic model in the expanded dataset and compared to the clinical model using area under the receiver operating characteristic curve (C-statistic) as well as 3 global measures of model fit (likelihood ratio test, Akaike information criterion and Bayesian information criterion).

We further computed the category-free net reclassification index (NRI) and integrated discrimination index (IDI), which estimate the models' respective abilities to correctly classify patients with normal versus prolonged postoperative QTc.<sup>8</sup>

## II. SUPPLEMENTAL RESULTS

### Ila. Distribution of perioperative changes in QTc interval

To provide a clearer representation of the variance in QTc interval encountered in the perioperative period, we present below scatter plots of preoperative and postoperative QTc interval values in the discovery (N=497) and joint analysis (N=957) cohorts. Thick lines indicate median values (**Figure S1**);

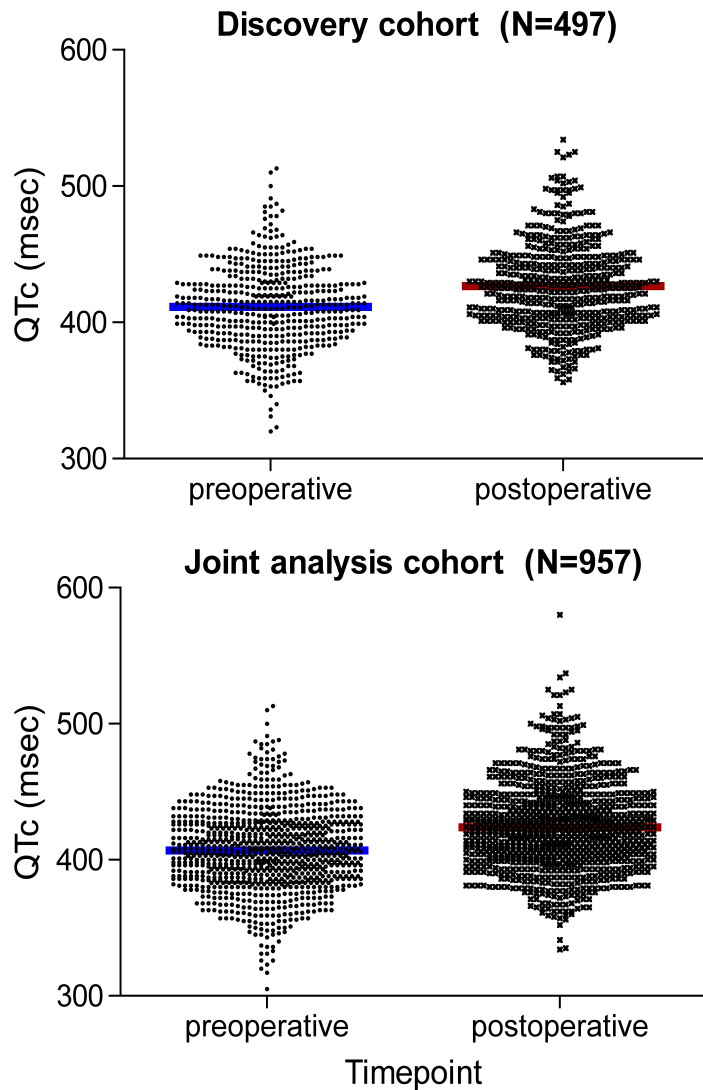

Although some patients demonstrated a reduction in QTc interval perioperatively, overall the median postoperative QTc interval duration increased compared to preoperative values by 14 ms and 16 ms in the discovery and joint analysis cohorts, respectively ( $p < 0.0001$  for both).

**IIb. Univariate and covariate-adjusted genetic association tests for all candidate gene polymorphisms studied (based on additive inheritance model)**

**Table S5.** Univariable and multivariable logistic regression analysis for the *discovery dataset*

| Chr | Gene  | SNP              | BP        | Univariable analysis |         | Multivariable analysis |             |
|-----|-------|------------------|-----------|----------------------|---------|------------------------|-------------|
|     |       |                  |           | OR (95%CI)           | P-value | OR (95%CI)             | P-value*    |
| 1   | CRP   | rs1205           | 159682233 | 0.89 (0.64-1.24)     | 0.51    | 0.93 (0.65-1.37)       | 0.71        |
| 1   | IL10  | rs1800871        | 206946634 | 1.02 (0.73-1.43)     | 0.90    | 0.96 (0.70-1.52)       | 0.82        |
| 1   | AGT   | rs4762           | 230845977 | 0.79 (0.51-1.24)     | 0.31    | 0.92 (0.56-1.50)       | 0.75        |
| 1   | AGT   | rs5051           | 230849872 | 0.90 (0.70-1.16)     | 0.43    | 0.94 (0.78-1.44)       | 0.69        |
| 2   | IL1A  | rs17561          | 113537223 | 1.27 (0.92-1.74)     | 0.14    | 1.16 (0.76-1.56)       | 0.44        |
| 2   | IL1A  | rs1800587        | 113542960 | 1.09 (0.79-1.50)     | 0.59    | 1 (0.69-1.43)          | 0.99        |
| 2   | IL1B  | <b>rs1143633</b> | 113590467 | 0.71 (0.51-0.99)     | 0.04    | 0.73 (0.49-1.08)       | <b>0.1</b>  |
| 2   | IL1B  | <b>rs16944</b>   | 113594867 | 1.52 (0.98-1.70)     | 0.04    | 1.35(0.98-1.85)        | <b>0.06</b> |
| 2   | IL1RN | rs419598         | 113887207 | 1.06(0.78-1.43)      | 0.73    | 1.26 (0.85-1.73)       | 0.21        |
| 2   | IL1RN | <b>rs315952</b>  | 113890304 | 0.81 (0.60-1.08)     | 0.16    | 0.67 (0.50-1.00)       | <b>0.03</b> |
| 3   | SCN5A | rs1805124        | 38645420  | 0.75 (0.52-1.09)     | 0.13    | 0.75 (0.49-1.14)       | 0.18        |
| 3   | AGTR1 | rs5186           | 148459988 | 1.16 (0.85-1.59)     | 0.36    | 1.13 (0.75-1.58)       | 0.54        |
| 5   | ADRB2 | rs1042711        | 148206348 | 0.82 (0.59-1.13)     | 0.21    | 0.89 (0.63-1.32)       | 0.54        |
| 5   | ADRB2 | rs1800888        | 148206885 | 1.53(0.54-4.39)      | 0.43    | 1.07 (0.31-3.69)       | 0.91        |
| 6   | TNFA  | rs1800629        | 31543031  | 1.17 (0.80-1.71)     | 0.42    | 1.06 (0.67-1.60)       | 0.79        |
| 6   | TNFA  | rs361525         | 31543101  | 1.11 (0.62-2.01)     | 0.72    | 1.33 (0.68-2.67)       | 0.41        |
| 6   | TNFA  | rs1800610        | 31543827  | 1.27 (0.72-2.23)     | 0.41    | 1.23 (0.58-2.12)       | 0.53        |
| 7   | IL6   | rs1800796        | 22766246  | 0.63 (0.32-1.26)     | 0.19    | 0.76 (0.35-1.65)       | 0.49        |
| 7   | IL6   | rs1800795        | 22766645  | 0.91 (0.68-1.24)     | 0.56    | 0.92 (0.58-1.21)       | 0.68        |
| 7   | NOS3  | rs2070744        | 150690079 | 0.93 (0.70-1.23)     | 0.59    | 1.05 (0.70-1.35)       | 0.77        |
| 7   | NOS3  | rs1799983        | 150696111 | 0.98 (0.73-1.31)     | 0.87    | 1.18 (0.77-1.55)       | 0.35        |
| 7   | NOS3  | rs1799985        | 150709570 | 0.96 (0.71-1.31)     | 0.81    | 0.8 (0.55-1.14)        | 0.24        |
| 8   | ADRB3 | rs4994           | 37823798  | 1.01 (0.61-1.69)     | 0.96    | 0.75 (0.44-1.48)       | 0.36        |
| 10  | ADRB1 | rs1801252        | 115804036 | 1.19 (0.80-1.76)     | 0.40    | 1.17 (0.77-1.89)       | 0.51        |
| 10  | VMAT2 | rs2072362        | 119014023 | 0.94 (0.58-1.51)     | 0.79    | 0.91 (0.53-1.65)       | 0.75        |
| 11  | CAT   | <b>rs769214</b>  | 34459717  | 0.78 (0.58-1.05)     | 0.10    | 0.71 (0.54-1.05)       | <b>0.04</b> |
| 11  | CAT   | rs1001179        | 34460231  | 1.10 (0.78-1.54)     | 0.59    | 1.24 (0.77-1.69)       | 0.29        |
| 12  | GNB3  | rs5443           | 6954875   | 1.11 (0.84-1.46)     | 0.46    | 1.17 (0.95-1.91)       | 0.35        |
| 17  | ACE   | rs4646994        | 61565904  | 0.97 (0.74-1.27)     | 0.81    | 0.95 (0.69-1.27)       | 0.72        |
| 17  | ACE   | rs4344           | 61566724  | 1.02 (0.78-1.35)     | 0.87    | 0.99 (0.72-1.33)       | 0.96        |
| 19  | TGFB1 | rs1800472        | 41847860  | 0.80 (0.28-2.27)     | 0.68    | 0.69 (0.21-2.24)       | 0.52        |
| 19  | TGFB1 | rs1800471        | 41858876  | 1.21 (0.75-1.95)     | 0.43    | 1.17 (0.62-1.85)       | 0.58        |
| 19  | TGFB1 | rs1800470        | 41858921  | 1.24 (0.93-1.66)     | 0.15    | 1.14 (0.82-1.60)       | 0.45        |
| 19  | TGFB1 | rs1800469        | 41860296  | 1.03 (0.75-1.42)     | 0.86    | 0.98 (0.68-1.41)       | 0.92        |
| 19  | TGFB1 | rs1800468        | 41860587  | 0.76 (0.42-1.39)     | 0.38    | 0.69 (0.36-1.45)       | 0.31        |
| 20  | MMP9  | rs3918242        | 44635976  | 1.20 (0.79-1.81)     | 0.39    | 1.16 (0.74-1.86)       | 0.54        |
| 22  | COMT  | rs165688         | 19951271  | 1.11 (0.84-1.45)     | 0.47    | 1.26 (0.89-1.64)       | 0.15        |

\*Adjusted for age, female gender, self-reported ethnicity, left ventricular ejection fraction, preoperative QTc interval prolongation, diuretic use at hospital admission, aortic cross clamp time, procedure type, and the top 6 principal components identified in population stratification analysis. Reported P-values from Wald Chi-square tests, unadjusted for multiple testing. Markers with P≤0.1 (highlighted in bold) were selected for the stage II replication analysis. Excluded SNPs that deviated from HWE are: rs4291 (*ACE*), rs1801253 (*ADRB1*), rs1042713 (*ADRB2*), rs1042714 (*ADRB2*), rs699 (*AGT*), rs1057128 (*KCNQ1*), rs3025058 (*MMP3*), rs1061622 (*TNFRS1B*). Chr, chromosome; SNP, single nucleotide polymorphism ID (<http://www.ncbi.nlm.nih.gov/SNP/>); BP, variant base-pair position in human genome sequence.

### ***Ilc. Power calculation***

The effect size detectable by our study sample size with 80% power was estimated using the Genetic Power Calculator (<http://pngu.mgh.harvard.edu/~purcell/gpc/>).<sup>9</sup> As an example, we used *IL1B* rs1143633, which has a minor allele frequency (MAF) of 0.3 and odds ratio (OR) of 0.7 from stage I analysis, and *IL1B* rs16944 – MAF=0.4 and OR=1.3 in stage I analysis. We assumed 30% disease prevalence and the stage I analysis sample sizes (151 cases and 346 controls). We varied the minor allele frequency of the disease locus (0.2, 0.3, 0.4) to assess the genotypic relative risk (GRR) that our study sample size can detect with 80% power. We used the same nominal significance threshold ( $p \leq 0.1$ ) described the stage I analysis. We assumed an additive model to define GRR of Aa and AA genotypes. If the marker tested was in complete linkage disequilibrium ( $D' = 1$ ) with the disease locus, we found that our stage I sample size has approximately 80% power to detect a GRR = 0.65 for a common disease locus (MAF = 0.2) and GRR = 1.55 for a very common disease locus (MAF = 0.4). The effect sizes become slightly higher when  $D'$  is assumed at 0.8 between disease locus and marker (**Table S6**). The OR for rs1143633 in stage I analyses was 0.71, which is consistent with the estimate here. As outlined in the paper, current evidence supports joint 2-stage analysis designs over replication analyses in GWAS, based on increased statistical power of joint analyses,<sup>10-12</sup> which formed the rationale for our study design.

**Table S6:** GRR estimates that our stage I analysis dataset can detect a given disease locus MAF at approximately 80% power when marker MAF = 0.1, sample size = 151 cases and 346 controls, and disease prevalence = 30%.

| $D'$ | Disease locus MAF | Odds Ratio | Power |
|------|-------------------|------------|-------|
| 1    | 0.2               | 0.65       | 0.84  |
|      | 0.3               | 0.7        | 0.8   |
|      | 0.4               | 1.55       | 0.82  |
| 0.8  | 0.2               | 0.55       | 0.81  |
|      | 0.3               | 0.6        | 0.82  |
|      | 0.4               | 1.75       | 0.8   |

### ***Ild. Reclassification analysis***

To evaluate the added predictive ability of *IL1B* variants over that of clinical variables to identify patients at risk of postoperative QTc prolongation, we compared the performance of the clinical vs clinico-genetic risk prediction models using reclassification analysis.<sup>8, 13</sup>

The number of patients with complete genotype information at both *IL1B* polymorphisms was 707. Of those, n=187 had prolonged postoperative QTc (prolonged QTc) and n=520 had normal postoperative QTc (non-prolonged QTc). A reclassification table, indicating the proportions of positive and negative changes in predicted probabilities of postoperative QTc status between the clinico-genetic risk prediction model relative to the clinical risk prediction model is presented below.



|                                    | <i>Proportion</i> |
|------------------------------------|-------------------|
| Increase for prolonged QTc (1)     | 0.583             |
| Increase for non-prolonged QTc (2) | 0.429             |
| Decrease for prolonged QTc (3)     | 0.417             |
| Decrease for non-prolonged QTc (4) | 0.571             |

#### Net Reclassification Improvement (NRI)

|                                 | <i>Index</i> | <i>SE</i> | <i>Z</i> | <i>P</i> | <i>Lower 0.95</i> | <i>Upper 0.95</i> |
|---------------------------------|--------------|-----------|----------|----------|-------------------|-------------------|
| NRI (1-3+4-2)                   | 0.308        | 0.0853    | 3.61     | 0.000303 | 0.1410            | 0.475             |
| NRI for prolonged QTc (1-3)     | 0.166        | 0.0731    | 2.27     | 0.023394 | 0.0224            | 0.309             |
| NRI for non-prolonged QTc (4-2) | 0.142        | 0.0439    | 3.25     | 0.001174 | 0.0564            | 0.228             |

Notations as in the table above – 1, increased risk for prolonged QTc; 2, increased risk for non-prolonged QTc; 3, decreased risk for prolonged QTc; 4, decreased risk for non-prolonged QTc. Reclassification table shows individual NRI values for cases, controls and an overall value, together with summary statistics - z-statistic for the test, the associated p-value, and 95% confidence intervals.

#### Analysis of Changes in Predicted Probabilities

|                                              | <i>Mean Change in Probability</i> |
|----------------------------------------------|-----------------------------------|
| Increase for prolonged QTc (sensitivity)     | 0.01257                           |
| Decrease for non-prolonged QTc (specificity) | 0.00778                           |

#### Integrated Discrimination Improvement (IDI)

(average of sensitivity and 1-specificity over [0,1]; also is difference in Yates' discrimination slope)

| <i>IDI</i> | <i>SE</i> | <i>Z</i> | <i>P</i> | <i>Lower 0.95</i> | <i>Upper 0.95</i> |
|------------|-----------|----------|----------|-------------------|-------------------|
| 0.0204     | 0.00482   | 4.23e+00 | 2.37e-05 | 0.0109            | 0.0298            |

An IDI of 0.02 means that the difference in average predicted risks between patients with and without prolonged postoperative QTc increased by 2% in the clinico-genetic model compared to the clinical risk model.

By drawing attention to which proportion of patients are reclassified from low to high and from high to low risk, this presentation enables ready assessment of the incremental value of the genetic markers for improving clinical risk classification. The increase in sensitivity highlighted by the reclassification analysis is a key attribute in many clinical decision problems. Given the relatively small dataset used in our study, the effect estimates for markers may be exaggerated, and such overfit can lead to overoptimistic estimates of model performance.<sup>14</sup>

### ***Ile. Perioperative temporal changes in serum levels of IL-1 receptor antagonist (IL-1Ra)***

A time-course analysis of changes in serum IL1-Aa levels was conducted in a subset (n=288) of patients with available serial serum samples and *IL1RN* genotypes, based on selection of the *IL1RN* rs315952 polymorphism in stage I analyses (note: the gene code for interleukin 1-receptor antagonist is abbreviated *IL1RN*, whereas the protein is abbreviated IL1-Ra). To our knowledge, previous reports of temporal changes in circulating IL1-ra following cardiac surgery are currently lacking. In our cohort, serum levels of IL-1ra rose sharply at 4h post aortic cross-clamp release, and remained significantly elevated at 24 and 48h compared to preoperative values (**Figure S2**,  $p < 0.001$ ). We found no differences in IL1-Ra levels by rs315952 status (data not shown).

**Figure S2.** Perioperative changes in serum Interleukin-1 receptor antagonist (IL-1ra) in patients undergoing cardiac surgery (N=288)

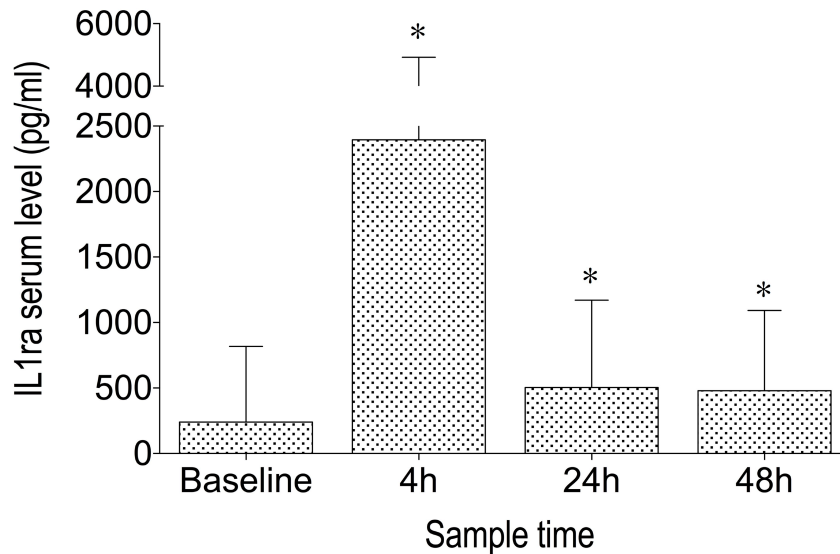

Sampling timepoints are preoperative (base) and 4h, 24h and 48h after aortic cross-clamp removal. Results are expressed as means  $\pm$  SD in all patients. \* $p < 0.01$  difference compared to preoperative (baseline) values (Kruskal-Wallis test with Dunn's post-hoc multiple comparison test)

## **Supplemental References**

1. Lobato RL, White WD, Mathew JP, Newman MF, Smith PK, McCants CB, Alexander JH and Podgoreanu MV. Thrombomodulin gene variants are associated with increased mortality after coronary artery bypass surgery in replicated analyses. *Circulation*. 2011;124:S143-8.
2. Stierle U, Giannitsis E, Sheikhzadeh A, Kruger D, Schmucker G, Mitusch R and Potratz J. Relation between QT dispersion and the extent of myocardial ischemia in patients with three-vessel coronary artery disease. *Am J Cardiol*. 1998;81:564-8.
3. Price AL, Patterson NJ, Plenge RM, Weinblatt ME, Shadick NA and Reich D. Principal components analysis corrects for stratification in genome-wide association studies. *Nature genetics*. 2006;38:904-9.
4. Podgoreanu MV, White WD, Morris RW, Mathew JP, Stafford-Smith M, Welsby IJ, Grocott HP, Milano CA, Newman MF and Schwinn DA. Inflammatory gene polymorphisms and risk of postoperative myocardial infarction after cardiac surgery. *Circulation*. 2006;114:I275-81.
5. Gabriel SB, Schaffner SF, Nguyen H, Moore JM, Roy J, Blumenstiel B, Higgins J, DeFelice M, Lochner A, Faggart M, Liu-Cordero SN, Rotimi C, Adeyemo A, Cooper R, Ward R, Lander ES, Daly MJ and Altshuler D. The structure of haplotype blocks in the human genome. *Science*. 2002;296:2225-9.
6. Wigginton JE, Cutler DJ and Abecasis GR. A note on exact tests of Hardy-Weinberg equilibrium. *American journal of human genetics*. 2005;76:887-93.
7. Patterson N, Price AL and Reich D. Population structure and eigenanalysis. *PLoS genetics*. 2006;2:e190.
8. Pencina MJ, D'Agostino RB, Sr. and Steyerberg EW. Extensions of net reclassification improvement calculations to measure usefulness of new biomarkers. *Statistics in medicine*. 2011;30:11-21.
9. Purcell S, Cherny SS and Sham PC. Genetic Power Calculator: design of linkage and association genetic mapping studies of complex traits. *Bioinformatics*. 2003;19:149-50.
10. Kraft P. Efficient two-stage genome-wide association designs based on false positive report probabilities. *Pacific Symposium on Biocomputing Pacific Symposium on Biocomputing*. 2006:523-34.
11. Zuo Y, Zou G, Wang J, Zhao H and Liang H. Optimal two-stage design for case-control association analysis incorporating genotyping errors. *Annals of human genetics*. 2008;72:375-87.

12. Zuo Y, Zou G and Zhao H. Two-stage designs in case-control association analysis. *Genetics*. 2006;173:1747-60.
13. Pencina MJ, D'Agostino RB, Sr., D'Agostino RB, Jr. and Vasan RS. Evaluating the added predictive ability of a new marker: from area under the ROC curve to reclassification and beyond. *Stat Med*. 2008;27:157-72; discussion 207-12.
14. Steyerberg EW, Vedder MM, Leening MJ, Postmus D, D'Agostino RB, Sr., Van Calster B and Pencina MJ. Graphical assessment of incremental value of novel markers in prediction models: From statistical to decision analytical perspectives. *Biom J*. 2015;57:556-70.

***Duke Perioperative Genetics and Safety Outcomes (PEGASUS) Investigative Team Members:***

Cooter M, Davis RD, Danseshmand M, Funk B, Gaca JG, Ghadimi K, Ginsburg GS, Glower DD, Hall RL, Hauser E, Jones R, Kertai MD, Laskowitz DT, Li YJ, Lodge AJ, Mathew JP, Milano CA, Moretti EW, Newman MF, Quinones QJ, Podgoreanu MV, Schroder J, Smith MP, Smith PK, Stafford-Smith M, Swaminathan M, Welsby IJ, White WD
